# Supplementary material
Source: PubMed Central journal article supplement (PMC3319212)
Supplement: supp_jc.2011-2562_11-2562_Tables_1-8.pdf [file supp_jc.2011-2562_11-2562_Tables_1-8.pdf]

**Supplement Table S1.** Characteristics of participants and endometrial tissue biopsy samples in the study

| Subject ID              | Cycle Phase | Diagnosis                                                              | Age | Ethnicity    |
|-------------------------|-------------|------------------------------------------------------------------------|-----|--------------|
| <i>No Endometriosis</i> |             |                                                                        |     |              |
| <b>M182</b>             | PE          | Pipelle endometrial biopsy- normal volunteer                           | 34  | Caucasian    |
| <b>598</b>              | PE          | Leiomyomata                                                            | 33  | Black        |
| <b>562</b>              | PE          | Leiomyomata                                                            | 50  | Caucasian    |
| <b>495</b>              | PE          | Leiomyomata                                                            | 49  | Caucasian    |
| <b>641</b>              | PE          | Leiomyomata                                                            | 43  | Black        |
| <b>715</b>              | PE          | Dysmenorrhea                                                           | 32  | Asian        |
| <b>629</b>              | ESE         | Leiomyomata                                                            | 46  | Caucasian    |
| <b>664</b>              | ESE         | Uterine prolapse; adenomyosis                                          | 44  | Other        |
| <b>650</b>              | ESE         | Leiomyomata                                                            | 48  | Caucasian    |
| <b>320</b>              | ESE         | Pelvic pain and adhesive disease                                       | 27  | Asian        |
| <b>610</b>              | MSE         | Leiomyomata                                                            | 49  | Caucasian    |
| <b>617</b>              | MSE         | Pelvic pain (no endometriosis at laparoscopy)                          | 42  | Caucasian    |
| <b>626</b>              | MSE         | Uterine prolapse                                                       | 42  | Caucasian    |
| <b>409</b>              | MSE         | Uterine prolapse                                                       | 40  | Asian        |
| <b>442</b>              | LSE         | Leiomyomata; adenomyosis                                               | 43  | Black        |
| <b>449</b>              | LSE         | Leiomyomata                                                            | 39  | Caucasian    |
| <b>462</b>              | LSE         | Leiomyomata                                                            | 39  | Asian        |
| <b>648</b>              | LSE         | Leiomyomata                                                            | 45  | Caucasian    |
| <i>Endometriosis*</i>   |             |                                                                        |     |              |
| <b>G26A</b>             | PE          | Severe endometriosis                                                   | 31  | Caucasian    |
| <b>651</b>              | PE          | Severe endometriosis                                                   | 37  | Caucasian    |
| <b>511</b>              | PE          | Severe endometriosis                                                   | 42  | Caucasian    |
| <b>ST-70</b>            | PE          | Severe endometriosis                                                   | 22  | Caucasian    |
| <b>575</b>              | PE          | Severe endometriosis                                                   | 26  | Unknown      |
| <b>27A</b>              | ESE         | Severe endometriosis                                                   | 22  | Caucasian    |
| <b>517</b>              | ESE         | Severe endometriosis                                                   | 35  | Asian        |
| <b>607</b>              | ESE         | Severe endometriosis                                                   | 24  | Asian        |
| <b>489</b>              | ESE         | Severe endometriosis                                                   | 39  | Asian        |
| <b>33A</b>              | MSE         | Severe endometriosis                                                   | 27  | Caucasian    |
| <b>635</b>              | MSE         | Severe endometriosis                                                   | 39  | Asian Indian |
| <b>7A</b>               | MSE         | Severe endometriosis                                                   | 35  | Unknown      |
| <b>516</b>              | MSE         | Severe endometriosis                                                   | 34  | Asian        |
| <b>678</b>              | MSE         | Severe endometriosis                                                   | 44  | Asian        |
| <b>ST-85</b>            | MSE         | Severe endometriosis                                                   | 34  | Caucasian    |
| <b>245</b>              | LSE         | Endometriosis, Pelvic prolapse                                         | 35  | Caucasian    |
| <b>259</b>              | LSE         | Minimal endometriosis                                                  | 36  | Caucasian    |
| <b>260</b>              | LSE         | Severe endometriosis                                                   | 44  | Caucasian    |
| <b>669</b>              | LSE         | Minimal endometriosis, enterocele, bilateral polycystic ovaries (PCOS) | 38  | Caucasian    |

\* The diagnosis of endometriosis was based on visualization of lesions found during laparoscopy and was also confirmed by histology. Endometrial staging was defined according to the revised American Fertility Society classification system (The American Fertility Society. Revised American Fertility Society classification of endometriosis: 1985. Fertil Steril 43:351–352).

**Supplement Table S2.** Oligonucleotide primers used for quantitative RT-PCR

| <b>Gene Name</b> | <b>Forward Primer</b>        | <b>Reverse Primer</b>            | <b>PCR Product Size (bp)</b> |
|------------------|------------------------------|----------------------------------|------------------------------|
| <i>18 S</i>      | 5'-TCTTAGCTGAGTGTCCCGCG-3'   | 5'-ATCATGGCCTCAGTTCCGA-3'        | 150                          |
| <i>BMP2</i>      | 5'-GACGCTCTTTCAATGGACGTG-3'  | 5'-AGCAGCAACGCTAGAAGACAGC-3'     | 105                          |
| <i>DKK1</i>      | 5'-GATCATAGCACCTTGGATGG-3'   | 5'-ACACAATCCTGAGGCACA-3'         | 120                          |
| <i>EGR1</i>      | 5'-AGCACCTTCAACCCTCA-3'      | 5'-AGTCGAGTGGTTTGGCT-3'          | 134                          |
| <i>IGFBP1</i>    | 5'-TTTACCTGCCAAACTGCAACAA-3' | 5'-TCTTCCCATTCCAAGGGTAGAC-3'     | 111                          |
| <i>IL8</i>       | 5'-GCGCCAACACAGAAATTATTG-3'  | 5'-ACCACAGAGAATGAATTTTTTTATGA-3' | 139                          |
| <i>KLF9</i>      | 5'-TGGCTGTGGGAAAGTCTATGG-3'  | 5'-CTCGTCTGAGCGGGAGAACT-3'       | 124                          |
| <i>PGR</i>       | 5'-CCT TTGGAAGGGCTACGAAGT-3' | 5'-GAGCTCGACACAACCTCTTTTG-3'     | 110                          |
| <i>PGR-B</i>     | 5'-CGACCCAGGAGGTGGAGAT-3'    | 5'-GAGGGAAAAGGGAAGGAGGAG-3'      | 105                          |
| <i>PRL</i>       | 5'-TCAACAGCTGCCACACTTCTTC-3' | 5'-CATTCCAGGATCGCAATATGC-3'      | 114                          |
| <i>WNT2</i>      | 5'-GAAAGGATGCCAGAGCC-3'      | 5'-TCCTGAGAGTACATGAGCC-3'        | 120                          |
| <i>WNT4</i>      | 5'-AGCAACTGGCTGTACCT -3'     | 5'-ACTTCCAGGTTCCGCTT-3'          | 122                          |

**Supplement Table S3.** Top 100 genes regulated by cAME-treatment of HESC [Fold-change for cAME vs. vehicle; (+) positive-regulation; (-) negative-regulation]

|                                  | Gene Name                                                 | Fold-change | Regulated by FGR | Regulated by KLF9 |
|----------------------------------|-----------------------------------------------------------|-------------|------------------|-------------------|
| <b>Top 50 up-regulated genes</b> |                                                           |             |                  |                   |
| <i>SST</i>                       | somatostatin                                              | 336.87      |                  |                   |
| <i>CGA</i>                       | glycoprotein hormones, alpha polypeptide                  | 186.72      |                  |                   |
| <i>IGFBP1</i>                    | insulin-like growth factor binding protein 1              | 184.97      |                  | +                 |
| <i>IGF1</i>                      | insulin-like growth factor 1 (somatomedin C)              | 116.17      | +                |                   |
| <i>NPR3</i>                      | natriuretic peptide receptor C                            | 109.99      | +                |                   |
| <i>RORB</i>                      | RAR-related orphan receptor B                             | 103.46      | +                |                   |
| <i>P2RY14</i>                    | purinergic receptor P2Y, G-protein coupled, 14            | 96.85       |                  |                   |
| <i>C5orf23</i>                   | chromosome 5 open reading frame 23                        | 86.84       | +                |                   |
| <i>AREG</i>                      | Amphiregulin                                              | 79.98       |                  |                   |
| <i>APCDD1</i>                    | adenomatosis polyposis coli down-regulated 1              | 75.42       | +                |                   |
| <i>CNR1</i>                      | cannabinoid receptor 1 (brain)                            | 55.50       | +                |                   |
| <i>PDK4</i>                      | pyruvate dehydrogenase kinase, isozyme 4                  | 48.95       | +                |                   |
| <i>CD83</i>                      | CD83 molecule                                             | 48.54       |                  |                   |
| <i>HSD11B1</i>                   | hydroxysteroid (11-beta) dehydrogenase 1                  | 40.41       |                  |                   |
| <i>CCL8</i>                      | chemokine (C-C motif) ligand 8                            | 38.95       |                  |                   |
| <i>MYOCD</i>                     | myocardin                                                 | 38.01       |                  |                   |
| <i>DNER</i>                      | delta/notch-like EGF repeat containing                    | 32.18       |                  |                   |
| <i>FKBP5</i>                     | FK506 binding protein 5                                   | 31.46       |                  |                   |
| <i>CHST7</i>                     | carbohydrate (N-acetylglucosamine 6-O) sulfotransferase 7 | 30.87       | +                |                   |
| <i>PI15</i>                      | peptidase inhibitor 15                                    | 30.39       |                  |                   |
| <i>MGP</i>                       | matrix Gla protein                                        | 27.76       |                  |                   |
| <i>ALDH1A3</i>                   | aldehyde dehydrogenase 1 family, member A3                | 26.92       | +                |                   |
| <i>INSL4</i>                     | insulin-like 4 (placenta)                                 | 26.84       | +                |                   |
| <i>ADAMTS3</i>                   | ADAM metallopeptidase with thrombospondin type 1 motif, 3 | 25.29       | +                |                   |
| <i>ZBTB16</i>                    | zinc finger and BTB domain containing 16                  | 24.24       | +                |                   |
| <i>CHSY3</i>                     | chondroitin sulfate synthase 3                            | 23.03       |                  |                   |
| <i>P4HA3</i>                     | prolyl 4-hydroxylase, alpha polypeptide III               | 20.06       |                  |                   |
| <i>MUMIL1</i>                    | melanoma associated antigen (mutated) 1-like 1            | 18.82       |                  |                   |
| <i>C7</i>                        | complement component 7                                    | 18.16       |                  |                   |
| <i>PTGER2</i>                    | prostaglandin E receptor 2 (subtype EP2), 53kDa           | 16.68       |                  |                   |
| <i>LOC129293</i>                 | hypothetical protein LOC129293                            | 16.52       |                  |                   |
| <i>LOC647131</i>                 | hypothetical LOC647131                                    | 15.67       |                  |                   |
| <i>KYNU</i>                      | kynureninase (L-kynurenine hydrolase)                     | 15.02       |                  |                   |
| <i>EDNRB</i>                     | endothelin receptor type B                                | 13.89       |                  |                   |
| <i>PCSK1</i>                     | proprotein convertase subtilisin/kexin type 1             | 13.85       |                  |                   |
| <i>WNT4</i>                      | wingless-type MMTV integration site family, member 4      | 13.73       | +                |                   |
| <i>ADRA2C</i>                    | adrenergic, alpha-2C-, receptor                           | 13.40       |                  |                   |
| <i>SCG2</i>                      | secretogranin II (chromogranin C)                         | 13.36       |                  |                   |
| <i>FOXO1</i>                     | forkhead box O1                                           | 12.75       |                  |                   |
| <i>PRL</i>                       | prolactin                                                 | 12.53       |                  |                   |
| <i>MAOA</i>                      | monoamine oxidase A                                       | 11.96       | +                |                   |
| <i>CSGALNACT1</i>                | chondroitin sulfate N-acetylgalactosaminyl transferase 1  | 11.59       | +                |                   |

|                                    |                                                                                   |        |   |   |
|------------------------------------|-----------------------------------------------------------------------------------|--------|---|---|
| <i>PID1</i>                        | phosphotyrosine interaction domain containing 1                                   | 11.39  |   |   |
| <i>MFSD6</i>                       | major facilitator superfamily domain containing 6                                 | 11.04  |   |   |
| <i>LOC645638</i>                   | similar to WDNM1-like protein                                                     | 10.21  |   |   |
| <i>IDI1</i>                        | inhibitor of DNA binding 1                                                        | 10.12  |   | + |
| <i>COL15A1</i>                     | collagen, type XV, alpha 1                                                        | 10.05  |   |   |
| <i>FAM167A</i>                     | family with sequence similarity 167, member A                                     | 9.95   |   | + |
| <i>LTBP1</i>                       | latent transforming growth factor beta binding protein 1                          | 9.68   |   |   |
| <i>IMPA2</i>                       | inositol(myo)-1(or 4)-monophosphatase 2                                           | 9.67   | + |   |
| <b>Top 50 down-regulated genes</b> |                                                                                   |        |   |   |
| <i>KRTAP1-5</i>                    | keratin associated protein 1-5                                                    | 143.17 |   |   |
| <i>CXCL3</i>                       | chemokine (C-X-C motif) ligand 3                                                  | 58.15  |   |   |
| <i>MEST</i>                        | mesoderm specific transcript homolog (mouse)                                      | 51.05  |   |   |
| <i>KIT</i>                         | v-kit Hardy-Zuckerman 4 feline sarcoma viral oncogene homolog                     | 40.95  |   |   |
| <i>CDC20</i>                       | cell division cycle 20 homolog (S. cerevisiae)                                    | 35.86  |   |   |
| <i>ANLN</i>                        | anillin, actin binding protein                                                    | 34.47  |   |   |
| <i>LYPD1</i>                       | LY6/PLAUR domain containing 1                                                     | 30.68  |   |   |
| <i>HTR2B</i>                       | 5-hydroxytryptamine (serotonin) receptor 2B                                       | 28.47  |   |   |
| <i>DLGAP5</i>                      | discs, large (Drosophila) homolog-associated protein 5                            | 27.61  |   |   |
| <i>PRC1</i>                        | protein regulator of cytokinesis 1                                                | 26.49  |   | - |
| <i>FAM176A</i>                     | family with sequence similarity 176, member A                                     | 24.96  |   |   |
| <i>RRM2</i>                        | ribonucleotide reductase M2 polypeptide                                           | 24.06  |   |   |
| <i>C21orf7</i>                     | chromosome 21 open reading frame 7                                                | 23.29  |   |   |
| <i>KIF20A</i>                      | kinesin family member 20A                                                         | 22.11  |   |   |
| <i>KRT34</i>                       | keratin 34                                                                        | 21.39  | - |   |
| <i>FJX1</i>                        | four jointed box 1 (Drosophila)                                                   | 21.13  |   |   |
| <i>SHCBP1</i>                      | SHC SH2-domain binding protein 1                                                  | 20.48  |   |   |
| <i>SLIT2</i>                       | slit homolog 2 (Drosophila)                                                       | 20.29  |   |   |
| <i>ASNS</i>                        | Asparagine synthetase                                                             | 20.11  |   |   |
| <i>LOXL4</i>                       | lysyl oxidase-like 4                                                              | 19.75  |   |   |
| <i>IL8</i>                         | interleukin 8                                                                     | 19.10  | - |   |
| <i>SCN9A</i>                       | sodium channel, voltage-gated, type IX, alpha subunit                             | 18.02  |   |   |
| <i>CDC2</i>                        | Cell division cycle 2, G1 to S and G2 to M                                        | 17.77  |   |   |
| <i>CDKN3</i>                       | cyclin-dependent kinase inhibitor 3                                               | 17.59  |   |   |
| <i>PSAT1</i>                       | phosphoserine aminotransferase 1                                                  | 17.55  |   |   |
| <i>APOBEC3B</i>                    | apolipoprotein B mRNA editing enzyme, catalytic polypeptide-like 3B               | 17.40  |   |   |
| <i>DDIT3/NR1H3</i>                 | DNA-damage-inducible transcript 3/nuclear receptor subfamily 1, group H, member 3 | 17.25  | - |   |
| <i>KRT19</i>                       | Keratin 19                                                                        | 17.09  |   |   |
| <i>HBD</i>                         | hemoglobin, delta                                                                 | 16.29  |   |   |
| <i>UHRF1</i>                       | ubiquitin-like with PHD and ring finger domains 1                                 | 16.19  |   | - |
| <i>KIAA0101</i>                    | KIAA0101                                                                          | 15.84  |   |   |
| <i>CXCL2</i>                       | chemokine (C-X-C motif) ligand 2                                                  | 15.58  |   |   |
| <i>DTL</i>                         | denticleless homolog (Drosophila)                                                 | 15.51  |   |   |
| <i>OXTR</i>                        | oxytocin receptor                                                                 | 15.50  |   |   |
| <i>MLF1IP</i>                      | MLF1 interacting protein                                                          | 15.44  |   |   |
| <i>AK5</i>                         | adenylate kinase 5                                                                | 15.36  |   | - |
| <i>OLR1</i>                        | oxidized low density lipoprotein (lectin-like) receptor 1                         | 15.22  |   |   |
| <i>CEP55</i>                       | centrosomal protein 55kDa                                                         | 15.13  |   |   |
| <i>SIPA1L2</i>                     | signal-induced proliferation-associated 1 like 2                                  | 14.12  |   |   |

|                |                                                        |       |  |  |
|----------------|--------------------------------------------------------|-------|--|--|
| <i>ENC1</i>    | ectodermal-neural cortex (with BTB-like domain)        | 14.00 |  |  |
| <i>LBH</i>     | limb bud and heart development homolog (mouse)         | 13.98 |  |  |
| <i>FAM83D</i>  | family with sequence similarity 83, member D           | 13.52 |  |  |
| <i>TPX2</i>    | TPX2, microtubule-associated, homolog (Xenopus laevis) | 13.07 |  |  |
| <i>NEIL3</i>   | nei endonuclease VIII-like 3 (E. coli)                 | 12.90 |  |  |
| <i>FAM84A</i>  | Family with sequence similarity 84, member A           | 12.62 |  |  |
| <i>NUSAP1</i>  | nucleolar and spindle associated protein 1             | 12.54 |  |  |
| <i>GINS1</i>   | GINS complex subunit 1 (Psf1 homolog)                  | 12.44 |  |  |
| <i>SLC38A4</i> | solute carrier family 38, member 4                     | 12.41 |  |  |
| <i>DEPDC1</i>  | DEP domain containing 1                                | 12.19 |  |  |
| <i>DIAPH3</i>  | diaphanous homolog 3 (Drosophila)                      | 12.14 |  |  |

**Supplement Table S4.** Top networks regulated with both *KLF9* and *PGR* knockdown identified through IPA (Total of 417 genes)\*

| <b>ID</b> | <b>Molecules in Network</b>                                                                                                                                                                                                                                                               | <b>Score</b> | <b>Focus molecules</b> | <b>Top Functions</b>                                                         |
|-----------|-------------------------------------------------------------------------------------------------------------------------------------------------------------------------------------------------------------------------------------------------------------------------------------------|--------------|------------------------|------------------------------------------------------------------------------|
| <b>1</b>  | ARNT, DUSP6, EGR1, EPOR, ERK, Estrogen Receptor, FJX1, G0S2, GDF15, hCG, HK2, HMGA2, IER3, INHBA, JUNB, MMP1 (includes EG:300339), NFkB (complex), NPR3, PDGF BB, PRDM2, PTHLH, SERPINB2, SLC4A4, SOAT1, STC1, STEAP1, TGM2, TIMP3, TM4SF1, TMEM158, TNFSF4, TNFSF13B, TRAF5, Vegf, VEGFC | 39           | 29                     | Cellular Growth and Proliferation, Cell Death, Cellular Movement             |
| <b>2</b>  | AHR, Akt, ANXA1, Ap1, AREG/AREGB, CCL7, CNR1, Creb, CREM, CYR61, DIABLO, EREG, ERK1/2, FABP5, IGF1, IGFBP1, IL8, IL1B, Immunoglobulin, JUN, LDL, MAFF, Mapk, NPC1, NR4A2, PGR, PI3K (complex), PLIN2, PPP1R12A, RAB4B, SERPINE1, TNFAIP6, TNFRSF11B, TNFSF10, ZEB1                        | 35           | 27                     | Cell Death, Cellular Growth and Proliferation, Cellular Movement             |
| <b>3</b>  | ACP5, AKAP7, ARL4C, ATP1B1, CD55, CD97, CDC37L1, CDKN1C, CRABP2, CXCL12, DHCR7, DHRS3, FSH, GEM, GK, GRK5, Hsp70, IER2, IFIH1, IFIT2, IFIT3, IFN Beta, IgG, Interferon alpha, Jnk, Lh, P38 MAPK, PAWR, PDXK, RAB27A, SLC16A6, TGFBR3, THBS1, TNPO1, TPM1 (includes EG:22003)              | 35           | 27                     | Cellular Development, Hematopoiesis, Nervous System Development and Function |
| <b>4</b>  | ACTN1, APOE, APP, ATP1B1, CSRNP1, DIRAS3, FADD, FANCC, GLUL, Hsp90, HSP90AA1, IFI44L, IGF1R, INSR, NAMPT, NOS2, NR3C1, PAWR, PDLIM1, PHF17, PIK3R3, PPARG, PPP2CA, PRKCB, PRKCE, PSEN1, PTN, RPGR, SDPR, SGPL1, SLC40A1, STAT3, TIMP3, TNFRSF12A, TNFSF4                                  | 17           | 17                     | Cancer, Endocrine System Disorders, Gastrointestinal Disease                 |
| <b>5</b>  | ADAM19, AKR1C1/AKR1C2, C11orf96, C13orf15, CD47, CDC25B, CDK1, Collagen type IV, Collagen(s), ETV5, FOXM1, GAS1, GLI1, HEY1, IMPA2, ITGA2, ITGAV, ITGB1, JUNB, LAMC2, Laminin, MMP2, MXI1, NR2F2, RPS6KB1, S100A4, SCD, SDC1, SLC2A1, TGFB1, TGFB2, THBS1, TMEM100, TNC, ZC3HAV1L         | 17           | 17                     | Cellular Movement, Nervous System Development and Function, Cancer           |
| <b>6</b>  | Actin, BAMBI, C19orf66, CTSD, DUSP4, FBLIM1, FERMT2, GADD45B, HBG1, HDAC1, HOXA5, HSP90B1, HSPA8, IFI35, IFNA2, MAD1L1, MTA2, NBN,                                                                                                                                                        | 17           | 17                     | Cellular Assembly and Organization, DNA Replication, Recombination, and      |

|    |                                                                                                                                                                                                                                                                   |    |    |                                                                  |
|----|-------------------------------------------------------------------------------------------------------------------------------------------------------------------------------------------------------------------------------------------------------------------|----|----|------------------------------------------------------------------|
|    | NR4A2, NUP153, POLD3, REST, RRM2, RUNX1T1, SATB1, SMARCA4, SMARCC1, SP110, ST6GALNAC5, TES, TP53, TRIM22, TSC22D3, UBE2L6, UHRF1                                                                                                                                  |    |    | Repair, Cell Death                                               |
| 7  | AKAP2/PALM2-AKAP2, ARRDC3, C9orf80, COL8A1, ETS2, GABPA, HRAS, ID2, INTS3, ITGB4, KIAA1199, KLF4, mir-135, MYB, MYC, MYCN, OBFC2A, ODC1, OXTR, PRDM5, PTGES, RNF144B, SAT1, SEMA3A, SHC4, SHMT2, SIK1, SKP2, SLC25A19, TAF1A, TAF1B, TAF1C, TCEAL1, TP73, ZNF217  | 17 | 17 | Cell Death, Cancer, Gene Expression                              |
| 8  | ALDH1A3, BACE1, BCL3, BCL2A1, CASP1, COL1A2, DUSP10, EPHB2, FLI1, Gm-csf, GPR126, HOXA13, IGFBP2, IL24, KAT2B, KYNU, LAMA3, LAMB3, MYCN, NFKBIE, OAS1, PDK4, PLSCR1, PPARD, PPP1R3C, REL, RIPK2, SERPINB1, SERPINB9, SERPINE1, SLC1A2, TNF, TNFSF13B, VAPA, WNT5A | 14 | 15 | Dermatological Diseases and Conditions, Cancer, Genetic Disorder |
| 9  | ADAM17, Akt, ARNT, BID, CAV2, CKS2, EDN1, EPO, EPOR, ERBB2, ERBB4, ERRF1, ESR1, GRB2, HBEGF, HERC6, IFNG, IGFBP5, INSR, IRS1, IRS2, MAP2, MTA1, MX2, NR2F1, p85 (pik3r), PDE3B, PIK3R1, PLA2G16, PPT1, SHC1, SLC15A3, STAT5A, TFF3, TPM1 (includes EG:22003)      | 14 | 15 | Cellular Movement, Cell Cycle, Tissue Development                |
| 10 | 26s Proteasome, AHR, ALG1, AR, ATAD2, CCND1, CCNT1, CDK9, ETV1, GPR37, H19, HEXIM1, IGF2, IGF2BP3, IGFBP1, IL2RB, KLF9, MAOA, MAT2A, MDFIC, NCOA3, PDE6B, PHOX2A, PI3K (complex), PIAS4, PSMD14, RAP1B, SLC22A4, SLC31A1, SP1, SP4, STUB1, TFF1, TGOLN2, ZBTB10   | 14 | 15 | Gene Expression, Organ Morphology, Cell Death                    |
| 11 | AXIN1, BACH1, BCL2L1, CDC14B, CEBPB, CTNNB1, DAPK1, DBP, DIXDC1, ESR1, FBN1, FSH, GSK3B, HIF1A, Hsp70, IL10, ITPRIP, Lh, MAP3K4, MAPK8, MCL1, miR-21/miR-590-5p, NOX4, NQO1, PBK, PDE4B, PLK2, PTEN, SMAD3, SPRY1, TMSB15A, TNF, TP53, TP73, VCAN                 | 9  | 11 | Cell Death, Developmental Disorder, Cancer                       |
| 12 | AGTR1, ALG5, ATF4, CA9, CGA, CHEK2, DKK1, E2F4, EZH2, HDAC9, Hdac, Histone h3, Histone h4, HOXA9, HOXA11, HPSE, ID1, IGFBP1, MTA1,                                                                                                                                | 7  | 10 | Cancer, Hematological Disease, Cell Cycle                        |

---

|           |                                                                                                                                                        |   |   |                                                                                             |
|-----------|--------------------------------------------------------------------------------------------------------------------------------------------------------|---|---|---------------------------------------------------------------------------------------------|
|           | MYCN, MYT1, NCOA3, PHF1, RB1,<br>RBBP4, RBL1, RNA polymerase II, RPS6,<br>RRM2, SRPK2, SRPR, SUZ12,<br>TP53INP1, WNT1, ZNF91                           |   |   |                                                                                             |
| <b>13</b> | ABCA1, C21orf7, CXCR7, FABP4, FADS1,<br>FAM162A, HIC1, IL13, KAZN, KITLG,<br>PAPPA, PPARG, RAB33A, RIN2,<br>RQCD1, SPINT2, STAT6, TAL1, TCF3,<br>TCF12 | 7 | 8 | Cellular Development,<br>Hematological System<br>Development and<br>Function, Hematopoiesis |

---

\* *siKP*-regulated genes (*siKP* vs. NT);  $\geq 1.5$  fold-change



**Supplement Table S5.** Top biological functions of differentially expressed KLF9+PGR targets in cAME-treated HESC identified through IPA (Total of 417 genes)\*

| <b>Biological Functions</b>                          | <b>P-value</b> | <b>No. of Molecules</b> |
|------------------------------------------------------|----------------|-------------------------|
| <u>Diseases and disorders</u>                        |                |                         |
| Cancer                                               | 3.07E-14       | 158                     |
| Reproductive system disease                          | 1.66E-12       | 114                     |
| Gastrointestinal disease                             | 2.04E-07       | 69                      |
| Dermatological diseases and conditions               | 8.64E-07       | 61                      |
| Genetic disorder                                     | 8.64E-07       | 228                     |
| <u>Molecular and cellular functions</u>              |                |                         |
| Cell death                                           | 7.21E-10       | 83                      |
| Cellular movement                                    | 1.23E-08       | 60                      |
| Cellular growth and proliferation                    | 1.52E-08       | 100                     |
| Cellular development                                 | 1.06E-06       | 63                      |
| Gene expression                                      | 1.65E-05       | 71                      |
| <u>Physiological system development and function</u> |                |                         |
| Hematological system development and function        | 1.09E-05       | 29                      |
| Immune cell trafficking                              | 1.09E-05       | 13                      |
| Organ morphology                                     | 2.69E-05       | 4                       |
| Tissue development                                   | 5.19E-05       | 50                      |
| Hematopoiesis                                        | 5.50E-05       | 25                      |

\* *siKP*-regulated genes (*siKP* vs. NT);  $\geq 1.5$  fold-change

**Supplement Table S6.** Canonical Pathways identified using IPA with both *KLF9* and *PGR* knockdown (Total of 417 genes)

| <b>Ingenuity Canonical Pathway</b>                                             | <b>-log (P-value)</b> | <b>P-value</b> | <b>Ratio</b> | <b>Molecules</b>                                                                                  |
|--------------------------------------------------------------------------------|-----------------------|----------------|--------------|---------------------------------------------------------------------------------------------------|
| Role of IL-17F in allergic inflammatory airway disease                         | 3.312                 | 4.88E-04       | 0.143        | ATF4, CCL7, IGF1, IL8, IL1B, SIK1                                                                 |
| Role of tissue factor in cancer                                                | 2.267                 | 5.41E-03       | 0.074        | CFL2, CYR61, EGR1, IL8, IL1B, MMP1, PIK3R3, VEGFC                                                 |
| Chondroitin sulfate biosynthesis                                               | 2.214                 | 6.11E-03       | 0.106        | CHST7, CHSY3, CSGALNACT1, UST, XYLT2                                                              |
| Inhibition of angiogenesis by TSP1                                             | 2.022                 | 9.51E-03       | 0.121        | CD47, JUN, SDC1, THBS1                                                                            |
| HMGB1 signaling                                                                | 2.016                 | 9.64E-03       | 0.072        | DIRAS3, IL8, JUN, PIK3R3, RHOU, SERPINE1, TNFRSF11B                                               |
| Role of macrophages, fibroblasts and endothelial cells in rheumatoid arthritis | 1.876                 | 1.33E-03       | 0.045        | ATF4, CXCL12, DKK1, IL8, IL1B, JUN, MMP1, PIK3R3, PLCL2, TNFRSF11B, TNFSF13B, TRAF5, VEGFC, WNT2  |
| Pantothenate and CoA biosynthesis                                              | 1.866                 | 1.36E-02       | 0.150        | BCAT1, DPYD, ILVBL                                                                                |
| Airway pathology in COPD                                                       | 1.785                 | 1.64E-02       | 0.250        | IL8, MMP1                                                                                         |
| Aryl hydrocarbon receptor signaling                                            | 1.719                 | 1.91E-02       | 0.057        | AHR, ALDH1A3, ARNT, HSP90B1, IL1B, JUN, NR2F1, TGM2                                               |
| Neuregulin signaling                                                           | 1.669                 | 2.14E-02       | 0.063        | ADAM17, AREG/AREGB, EREG, ERF11, HSP90B1, PIK3R3                                                  |
| Role of osteoblasts, osteoclasts and chondrocytes in rheumatoid arthritis      | 1.665                 | 2.16E-02       | 0.048        | ACP5, ADAM17, DKK1, IGF1, IL1B, JUN, MMP1, PIK3R3, TNFRSF11B, TRAF5, WNT2                         |
| Hepatic fibrosis/ hepatic stellate cell activation                             | 1.616                 | 2.42E-02       | 0.057        | BAMBI, IGF1, IL8, IL1B, MMP1, SERPINB2, TNFRSF11B, VEGFC                                          |
| Glucocorticoid receptor signaling                                              | 1.522                 | 3.01E-02       | 0.043        | ANXA1, CDKN1C, HSP90B1, IL8, IL1B, JUN, MMP1, PGR, PIK3R3, PRKAB2, PRKAG2, SERPINE1, BCAT1, ILVBL |
| Valine, leucine and isoleucine biosynthesis                                    | 1.513                 | 3.07E-02       | 0.182        | BCAT1, ILVBL                                                                                      |
| Arginine and proline metabolism                                                | 1.481                 | 3.3E-02        | 0.070        | ALDH1A3, LAP3, MAOA, ODC1, SAT1                                                                   |
| IGF-1 signaling                                                                | 1.442                 | 3.61E-02       | 0.059        | CYR61, IGF1, IGFBP1, JUN, PIK3R3, PRKAG2                                                          |
| ILK signaling                                                                  | 1.434                 | 3.68E-02       | 0.049        | ATF4, CFL2, DIRAS3, FERMT2, JUN, PIK3R3, PPP1R12A, RHOU, VEGFC                                    |
| Amyotrophic lateral sclerosis signaling                                        | 1.423                 | 3.77E-02       | 0.060        | CASP1, GLUL, IGF1, PIK3R3, SLC1A2, VEGFC                                                          |
| Role of pattern recognition receptors in recognition of bacteria and viruses   | 1.414                 | 3.86E-02       | 0.065        | CASP1, IFIH1, IL1B, OAS1, PIK3R3                                                                  |
| Nitric oxide signaling in the cardiovascular system                            | 1.392                 | 4.05E-02       | 0.062        | HSP90B1, PDE3B, PIK3R3, PRKAG2, VEGFC                                                             |
| TREM1 signaling                                                                | 1.390                 | 4.07E-02       | 0.075        | CASP1, CCL7, IL8, IL1B,                                                                           |
| cAMP-mediated signaling                                                        | 1.387                 | 4.10E-02       | 0.047        | AKAP7, AKAP2, ATF4, CNR1, CREM, DUSP6, NPR3, PDE3B, PDE4B, RGS18                                  |
| HIF1 $\alpha$ signaling                                                        | 1.369                 | 4.28E-02       | 0.058        | ARNGT, JUN, MMP1, PIK3R3, SLC2A1, VEGFC                                                           |
| Semaphorin signaling in neurons                                                | 1.364                 | 4.33E-02       | 0.077        | CFL2, DIRAS3, RHOU, SEMA3A,                                                                       |
| ATM signaling                                                                  | 1.364                 | 4.33E-02       | 0.074        | ATF4, GADD45B, JUN, NBN                                                                           |
| Production of NO and ROS in macrophages                                        | 1.358                 | 4.39E-02       | 0.049        | DIRAS3, JUN, PIK3R3, PPP1R12A, PPP1R3C, RAP1B, RHOU, TNFRSF11B                                    |
| Dopamine receptor signaling                                                    | 1.350                 | 4.46E-02       | 0.065        | MAOA, PPP1R12A, PPP1R3C, PRKAG2, QDPR                                                             |

|                                                |       |          |       |                                                                                                                                    |
|------------------------------------------------|-------|----------|-------|------------------------------------------------------------------------------------------------------------------------------------|
| Interferon signaling                           | 1.324 | 4.74E-02 | 0.088 | IFII35, IFIT3, OAS1                                                                                                                |
| Role of IL-17A in arthritis                    | 1.313 | 4.86E-02 | 0.067 | CCL7, IL8, MMP1, PIK3R3                                                                                                            |
| Ceramide signaling                             | 1.310 | 4.90E-02 | 0.061 | DIABLO, JUN, PIK3R3, S1PR2, TNFRSF11B                                                                                              |
| LPS/IL-1 mediated inhibition of RXR function   | 1.307 | 4.93E-02 | 0.045 | ALDH1A3, CHST7, FABP4, FABP5, IL1B, JUN, MAOA, TNFRSF11B, UST                                                                      |
| PPAR $\alpha$ /RXR $\alpha$ activation         | 1.304 | 4.97E-02 | 0.048 | GK, HSP90B1, IL1B, JUN, PLCL2, PRKAB2, PRKAG2, TGFB3, JUN, PDE3B, PDE4B, PIK3R3, PRKAG2, RAP1B, RXFP1                              |
| Relaxin signaling                              | 1.295 | 5.07E-02 | 0.049 | JUN, PDE3B, PDE4B, PIK3R3, PRKAG2, RAP1B, RXFP1                                                                                    |
| Cardiac $\beta$ -adrenergic signaling          | 1.281 | 5.24E-02 | 0.051 | AKAP7, AKAP2, PDE3B, PDE4B, PPP1R12A, PP1R3C, PRKAG2                                                                               |
| Sphingosine-1-phosphate signaling              | 1.267 | 5.40E-02 | 0.052 | CASP1, DIRAS3, PIK3R3, PLCL2, RHOU, S1PR2                                                                                          |
| Glioma invasiveness signaling                  | 1.242 | 5.73E-02 | 0.068 | DIRAS3, PIK3R3, RHOU, TIMP3                                                                                                        |
| IL-17A signaling in fibroblast                 | 1.228 | 5.92E-02 | 0.077 | CCL7, JUN, MMP1,                                                                                                                   |
| Estrogen-dependent breast cancer signaling     | 1.197 | 6.35E-02 | 0.062 | ATF4, IGF1, JUN, PIK3R3                                                                                                            |
| TR/RXR activation                              | 1.180 | 6.61E-02 | 0.056 | AKR1C1, KLF9, PDE3B, PIK3R3, SLC2A1                                                                                                |
| RAR activation                                 | 1.178 | 6.64E-02 | 0.046 | ALDH1A3, CRABP2, JUN, MMP1, NR2F1, PIK3R3, PNPLA4, PRKAG2                                                                          |
| Valine, leucine and isoleucine degradation     | 1.176 | 6.67E-02 | 0.066 | ALDH1A3, AOX1, BCAT1, MCEE                                                                                                         |
| Androgen and estrogen metabolism               | 1.176 | 6.67E-02 | 0.056 | AKR1C1, ARSG, CSGALNACT1, HSD17B6                                                                                                  |
| CDK5 signaling                                 | 1.145 | 7.15E-02 | 0.056 | EGR1, LAMB1, PPP1R12A, PPP1R3C, PRKAG2                                                                                             |
| Hypoxia signaling in the cardiovascular system | 1.134 | 7.34E-02 | 0.061 | ARNT, ATF4, HSP90B1, JUN                                                                                                           |
| Atherosclerosis signaling                      | 1.112 | 7.72E-02 | 0.049 | CXCL12, IL8, IL1B, MMP1, TNFRSF12A                                                                                                 |
| PPAR signaling                                 | 1.096 | 8.01E-02 | 0.050 | HSP90B1, IL1B, JUN, NR2F1                                                                                                          |
| Neurotrophin/TRK signaling                     | 1.094 | 8.05E-02 | 0.056 | ATF4, JUN, PIK3R3, SPRY1                                                                                                           |
| B cell activating factor signaling             | 1.089 | 8.15E-02 | 0.068 | JUN, TNFSF13B, TRAF5,                                                                                                              |
| G-protein coupled receptor signaling           | 1.083 | 8.26E-02 | 0.035 | ATF4, CD97, CNR1, DUSP6, GPR37, GPR126, GPR89A/GPR89B, LPHN3, NPR3, OXTR, PDE3B, PDE4B, PIK3R3, PRKAG2, PTHLH, RGS18, RXFP1, S1PR2 |
| p53 signaling                                  | 1.049 | 8.93E-02 | 0.053 | GADD45B, JUN, PIK3R3, THBS1, TP53INP1                                                                                              |
| IL-6 signaling                                 | 1.034 | 9.24E-02 | 0.051 | IL8, IL1B, JUN, TNFAIP6, TNFRSF11B                                                                                                 |
| Renal cell carcinoma signaling                 | 1.020 | 9.55E-02 | 0.056 | ARNT, JUN, PIK3R3, SLC2A1                                                                                                          |
| Chemokine signaling                            | 1.020 | 9.55E-02 | 0.059 | CCL7, CXCL12, JUN, PPP1R12A                                                                                                        |
| Polyamine regulation in colon cancer           | 1.003 | 9.92E-02 | 0.083 | ODC1, SAT1                                                                                                                         |
| Fructose and mannose metabolism                | 0.993 | 1.02E-01 | 0.067 | GMDS, HK2, TSTA3                                                                                                                   |
| Cellular effects of sildenafil (Viagra)        | 0.985 | 1.04E-01 | 0.047 | GPR37, PDE3B, PDE4B, PLCL2, PPP1R12A, PRKAG2,                                                                                      |
| OX40 signaling pathway                         | 0.950 | 1.12E-01 | 0.049 | JUN, TNFSF4, TRAF5                                                                                                                 |
| Cholecystokinin/gastrin-mediated signaling     | 0.949 | 1.13E-01 | 0.050 | CREM, DIRAS3, IL1B, JUN, RHOU                                                                                                      |
| Bile acid biosynthesis                         | 0.929 | 1.18E-01 | 0.060 | AKR1C1/AKR1C2, ALDH1A3, SOAT1                                                                                                      |
| Leptin signaling in obesity                    | 0.920 | 1.20E-01 | 0.052 | PDE3B, PIK3R3, PLCL2, PRKAG2,                                                                                                      |
| Synaptic long-term potentiation                | 0.909 | 1.23E-01 | 0.048 | ATF4, PPP1R12A, PPP1R3C, PRKAG2,                                                                                                   |

|                                                              |       |          |       |                                                                                               |
|--------------------------------------------------------------|-------|----------|-------|-----------------------------------------------------------------------------------------------|
|                                                              |       |          |       | RAP1B                                                                                         |
| LXR/RXR activation                                           | 0.904 | 1.25E-01 | 0.048 | CCL7, IL1B, SCD, TNFRSF11B                                                                    |
| IL-17A signaling in gastric cells                            | 0.877 | 1.33E-01 | 0.080 | IL8, JUN                                                                                      |
| Pentose and glucuronate interconversions                     | 0.877 | 1.33E-01 | 0.061 | CSGALNACT1, UCHL3                                                                             |
| Protein kinase A signaling                                   | 0.862 | 1.37E-01 | 0.036 | AKAP7, AKAP2, ATF4, CREM, PDE3B, PDE4B, PLCL2, PPP1R12A, PPP1R3C, PRKAG2, RAP1B               |
| Corticotrophin releasing hormone signaling                   | 0.859 | 1.38E-01 | 0.043 | ATF4, CNR1, JUN, PRKAG2, RAP1B                                                                |
| Type 2 diabetes mellitus signaling                           | 0.812 | 1.54E-01 | 0.040 | PIK3R3, PKM2, PRKAB2, PRKAG2, TNFRSF11B                                                       |
| Lymphotoxin $\beta$ receptor signaling                       | 0.799 | 1.59E-01 | 0.054 | DIABLO, PIK3R3, TRAF5                                                                         |
| NRF2-mediated oxidative stress response                      | 0.794 | 1.61E-01 | 0.037 | AOX1, ATF4, BACH1, JUN, JUNB, MAFF, PIK3R3                                                    |
| Glioblastoma multiforme signaling                            | 0.788 | 1.63E-01 | 0.038 | DIRAS3, IGF1, PIK3R3, PLCL2, RHOU, WNT2                                                       |
| Propanoate metabolism                                        | 0.782 | 1.65E-01 | 0.054 | ALDH1A3, MCEE, SUCLA2                                                                         |
| VEGF signaling                                               | 0.764 | 1.72E-01 | 0.044 | ARNT, EIF1AX, PIK3R3, VEGFC                                                                   |
| Bladder cancer signaling                                     | 0.752 | 1.77E-01 | 0.044 | IL8, MMP1, THBS1, VEGFC                                                                       |
| ERK/MAPK signaling                                           | 0.751 | 1.77E-01 | 0.035 | ATF4, DUSP6, PIK3R3, PPP1R12A, PPP1R3C, PRKAG2, RAP1B,                                        |
| Serotonin receptor signaling                                 | 0.750 | 1.78E-01 | 0.061 | MAOA, QDPR                                                                                    |
| Starch and sucrose metabolism                                | 0.750 | 1.78E-01 | 0.045 | CSGALNACT1, HK2, UCHL3                                                                        |
| P2Y purigenic receptor signaling pathway                     | 0.746 | 1.79E-01 | 0.040 | ATF4, JUN, PIK3R3, PLCL2, PRKAG2                                                              |
| Axonal guidance signaling                                    | 0.740 | 1.82E-01 | 0.031 | ADAM17, ADAM19, CFL2, CXCL12, EPHA5, IGF1, PIK3R3, PRKAG2, RAP1B, SEMA3A, SEMA5A, VEGFC, WNT2 |
| Retinoic acid mediated apoptosis signaling                   | 0.735 | 1.84E-01 | 0.049 | CRABP2, PARP9, TNFSF10,                                                                       |
| Xenobiotic metabolism signaling                              | 0.735 | 1.84E-01 | 0.034 | AHR, ALDH1A3, ARNT, CHST7, HSP90B1, IL1B, MAOA, PIK3R3, UST                                   |
| CXCR4 signaling                                              | 0.723 | 1.89E-01 | 0.038 | CXCL12, DIRAS3, EGR1, JUN, PIK3R3, RHOU                                                       |
| Complement system                                            | 0.707 | 1.96E-01 | 0.061 | CD55, MASP1                                                                                   |
| Insulin receptor signaling                                   | 0.706 | 1.97E-01 | 0.040 | PDE3B, PIK3R3, PPP1R12A, PPP1R3C, PRKAG2                                                      |
| Activation of IRF by cytosolic pattern recognition receptors | 0.705 | 1.97E-01 | 0.048 | IFIH1, IFIT2, JUN,                                                                            |
| PXR/RXR activation                                           | 0.691 | 2.04E-01 | 0.047 | IGFBP1, PRKAG2, SCD                                                                           |
| Assembly of RNA polymerase I complex                         | 0.683 | 2.08E-01 | 0.083 | TAF1A                                                                                         |
| CD40 signaling                                               | 0.677 | 2.1E-01  | 0.044 | JUN, PIK3R3, TRAF5                                                                            |
| Oncostatin M signaling                                       | 0.668 | 2.15E-01 | 0.059 | MMP1, TIMP3                                                                                   |
| NF- $\kappa$ B signaling                                     | 0.664 | 2.17E-01 | 0.035 | IL1B, PIK3R3, TGFBR3, TNFRSF11B, TNFSF13B, TRAF5                                              |
| Tyrosine metabolism                                          | 0.663 | 2.17E-01 | 0.045 | ALDH1A3, AOX1, MAOA                                                                           |
| Nitrogen metabolism                                          | 0.649 | 2.24E-01 | 0.057 | GLUL, TGM2,                                                                                   |
| Aminoacyl-tRNA biosynthesis                                  | 0.649 | 2.24E-01 | 0.057 | ERAS2, NARS2                                                                                  |
| Ovarian cancer signaling                                     | 0.640 | 2.29E-01 | 0.036 | CGA, PIK3R3, PRKAG2, VEGFC, WNT2                                                              |
| Glutamate metabolism                                         | 0.631 | 2.34E-01 | 0.056 | EARS2, GLUL                                                                                   |
| Colorectal cancer metastasis signaling                       | 0.616 | 2.42E-01 | 0.033 | DIRAS3, JUN, MMP1, PIK3R3, PRKAG2, RHOU, VEGFC,                                               |

|                                                        |       |          |       |                                                |
|--------------------------------------------------------|-------|----------|-------|------------------------------------------------|
|                                                        |       |          |       | WNT2                                           |
| Notch signaling                                        | 0.614 | 2.43E-01 | 0.049 | ADAM17, HEY1,                                  |
| Phenylalanine metabolism                               | 0.614 | 2.43E-01 | 0.054 | ALDH1A3, MAOA                                  |
| Erythropoietin signaling                               | 0.612 | 2.44E-01 | 0.041 | EPOR, JUN, PIK3R3                              |
| Melatonin signaling                                    | 0.612 | 2.44E-01 | 0.044 | PLCL2, PRKAG2, RORB                            |
| Glycine, serine and threonine metabolism               | 0.612 | 2.44E-01 | 0.044 | MAOA, PLCL2, SHMT2                             |
| Neuropathic pain signaling in dorsal horn neurons      | 0.608 | 2.46E-01 | 0.039 | GPR37, PIK3R3, PLCL2, PRKAG2,                  |
| Lysine biosynthesis                                    | 0.606 | 2.48E-01 | 0.091 | TGM2                                           |
| Acute phase response signaling                         | 0.601 | 2.50E-01 | 0.035 | CRABP2, IL1B, JUN, PIK3R3, SERPINE1, TNFRSF11B |
| Docosahexaenoic acid (DHA) signaling                   | 0.597 | 2.53E-01 | 0.050 | IL1B, PIK3R3                                   |
| April mediated signaling                               | 0.597 | 2.53E-01 | 0.048 | JUN, TRAF5                                     |
| Inositol phosphate metabolism                          | 0.581 | 2.62E-01 | 0.036 | GRK5, IMPA2, INPP5A, PIK3R3, PLCL2             |
| Aminosugars metabolism                                 | 0.577 | 2.65E-01 | 0.043 | HK2, PDE3B, PDE4B                              |
| Folate biosynthesis                                    | 0.574 | 2.67E-01 | 0.077 | QDPR                                           |
| Hepatic cholestasis                                    | 0.573 | 2.67E-01 | 0.035 | IL8, IL1B, JUN, PRKAG2, TNFRSR11B              |
| Ephrin receptor signaling                              | 0.573 | 2.68E-01 | 0.031 | ATF4, CFL2, CXCL12, EPHA5, RAP1B, VEGFC        |
| Rac signaling                                          | 0.571 | 2.69E-01 | 0.034 | CFL2, JUN, NOX4, PIK3R3,                       |
| IL-8 signaling                                         | 0.566 | 2.72E-01 | 0.034 | DIRAS3, IL8, NOX4, PIK3R3, RHOU, VEGFC         |
| IL-17 signaling                                        | 0.555 | 2.79E-01 | 0.041 | IL8, JUN, PIK3R3                               |
| Communication between innate and adaptive immune cells | 0.555 | 2.79E-01 | 0.032 | IL8, IL1B, TNFSF13B                            |
| mTOR signaling                                         | 0.532 | 2.94E-01 | 0.032 | DIRAS3, PIK3R3, PRKAB2, PRKAG2, RHOU, VEGFC    |
| TGF- $\beta$ signaling                                 | 0.449 | 3.56E-01 | 0.034 | INHBA, JUN, SERPINE1                           |
| Rank signaling in osteoclasts                          | 0.424 | 3.77E-01 | 0.033 | JUN, PIK3R3, TRAF5                             |
| HGF signaling                                          | 0.332 | 4.65E-01 | 0.029 | JUN, PIK3R3, RAP1B                             |

**Supplement Table S7.** List of KLF9+PGR- regulated genes in cAME-treated HESC that are associated with uterine pathologies<sup>a,b</sup>

| Functions Annotation | Molecules                                                                                                                                                                                                                                                                                                                                                                             | P-value  | No. of Molecules |
|----------------------|---------------------------------------------------------------------------------------------------------------------------------------------------------------------------------------------------------------------------------------------------------------------------------------------------------------------------------------------------------------------------------------|----------|------------------|
| 1. Endometriosis     | <b>AHR</b> , ALDH1A3, <b>ATF4</b> , ATP1B1, BCAT1, C13orf15, <b>CASP1</b> , CAV2, CYR61, DKK1, <b>EGR1</b> , <b>EPOR</b> , ERFF1, FBN1, <b>G0S2</b> , <b>HMGA2</b> , IGFBP1, <b>IL8</b> , <b>INHBA</b> , JUN, <b>JUNB</b> , <b>KIAA1199</b> , MAOA, MMP1 (includes EG:300339), <b>PBK</b> , PGR, <b>PLK2</b> , PRDM2, RAP1B, <b>REL</b> , SAT1, <b>STC1</b> , <b>TNFSF13B</b> , VEGFC | 1.58E-09 | 34               |
| 2. Uterine cancer    | <b>AHR</b> , ANXA1, ARNT, C16orf45, <b>CD97</b> , <b>CRABP2</b> , <b>CXCL12</b> , CYR61, DIXDC1, DKK1, <b>EPOR</b> , <b>ETV5</b> , FBN1, HSP90B1, <b>IFI44L</b> , <b>IFIH1</b> , <b>IFIT3</b> , IGF1, <b>IL8</b> , JUN, KLF9, <b>LPCAT2</b> , MAOA, MASP1, MRV11, ODC1, PDK4, PGR, PIK3R3, SDPR, TIMP3, <b>TPBG</b> , <b>TPM1</b> (includes EG:22003), ZEB1                           | 1.64E-06 | 34               |
| 3. Uterine leiomyoma | <b>AHR</b> , ARNT, <b>CD97</b> , <b>CRABP2</b> , CYR61, FBN1, <b>IFI44L</b> , <b>IFIH1</b> , <b>IFIT3</b> , JUN, MAOA, MRV11, PDK4, PIK3R3, SDPR, <b>TPBG</b> , ZEB1                                                                                                                                                                                                                  | 1.13E-04 | 17               |
| 4. Adenomyosis       | CDKN1C, <b>KCNE4</b> , LGMN, MRV11, RHOU, THBS1                                                                                                                                                                                                                                                                                                                                       | 2.68E-03 | 6                |

<sup>a</sup> Bold indicates up-regulation with *KLF9* and *PGR* knockdown (From 417 genes).

<sup>b</sup> Identified through IPA

**Supplement Table S8A.** Summary of GSEA of *siKP* vs. NT gene sets, with FDR  $\leq 0.25$

|                                  | GO                   | Functional Processes                       | Gene                                                                                                                                                                                                                                                                                                                                                                                                                                                          | FDR    |
|----------------------------------|----------------------|--------------------------------------------|---------------------------------------------------------------------------------------------------------------------------------------------------------------------------------------------------------------------------------------------------------------------------------------------------------------------------------------------------------------------------------------------------------------------------------------------------------------|--------|
| <b>Enriched in <i>siKP</i></b>   | Biological process   | Defense response                           | RSAD, IL8, MX2, MX1, TNFAIP6, NOX4, INHBA, CD97, CLEC1A, NMI, HRH1, CXCL2, IRAK2, IL1RAP, LY96, FOSL1, CEBPB, BCL10, GNLY, TCIRG1, GPR68, TGFB1, CBARA1, FAIM3, CEBPG, BNIP3, IL1A, SCG2, LILRB5, APOBEC3G, CCR6, PRF1, CYSLTR1, NFATC3, STAB1, C5, MST1R, MLF2, BNIP3L, PRDX5, TLR3, MBL2, CCL4, AGER, PLA2G7, LYST, KLRG1, MNDA, CD19, CCR7, S100A7, CXCL10, OR2H2, CHST2, KNG1, XCR1, DEFB127, DEFB103A, TRAT1, EREG, NCF2, CX3CR1, TACR1, IL17C, TNFRSF1A | 0.235  |
|                                  |                      | Response to biotic stimulus                | RSAD2, ERN1, ISG20, IFI44, CXCL12, IRF7, FOSL1, BCL10, BANF1, BNIP3, DNAJB2, APOBEC3G, TRIM22, TP53, SPACA3, HSPA1L, POLA1, CCL18, IFNGR2, STAB1, DNAJB1, BCL3, BNIP3L, DUOX2, TLR3, CCL4, HSPE1, DNAJA1, TNF, CD24, S100A7, DERL3, DEFB127, DEFB103A, DNAJC4, CCL8, APOBEC3F, IFNGR1, TOR1A, AMFR, HSPA1B, DERL2, IFNAR2, CCDC130, CCL22, HBXIP                                                                                                              | 0.237  |
|                                  |                      | Negative regulation of MAP kinase activity | DUSP6, RGS4, SPRED2, SPRED1, DUSP2                                                                                                                                                                                                                                                                                                                                                                                                                            | 0.249  |
|                                  | Molecular function   | Chemokine activity                         | IL8, CCL7, CXCL12, CXCL2, CKLF, CCL18, C5, CCL4, CXCL3, XCL2, CXCL10, CCL17, CCL2, CCL8                                                                                                                                                                                                                                                                                                                                                                       | 0.154  |
|                                  |                      | G protein coupled receptor binding         | IL8, CCL7, CXCL12, CXCL2, CKLF, REEP1, CCL18, C5, CCL4, CXCL3, XCL2, CXCL10, CCL17, CCL2, CCL8,                                                                                                                                                                                                                                                                                                                                                               | 0.158  |
|                                  |                      | Cytokine activity                          | TNFRSF11B, IL8, CCL7, GDF15, INHBA, CXCL12, CXCL2, SDCBP, SPRED2, MIF, SPRED1, CSF1, IL1RN, SCG2, CKLF, YARS, SECTM1, GH1, CCL18, C5, IL7, CCL4, CXCL3                                                                                                                                                                                                                                                                                                        | 0.209  |
| <b>Diminished in <i>siKP</i></b> | Cellular compartment | Proteinaceous extracellular matrix         | MUC5AC, APLP1, OPTC, TFPI2, COL7A1, COL3A1, COL9A1, COL1A2, COL5A2, ODAM, EFEMP1, ECM1, LAMC1, COL16A1, TNXB, DSPP, COL10A1,                                                                                                                                                                                                                                                                                                                                  | <0.001 |

---

|                           |                                                                                                                                                                                                                                                                                                                          |        |
|---------------------------|--------------------------------------------------------------------------------------------------------------------------------------------------------------------------------------------------------------------------------------------------------------------------------------------------------------------------|--------|
|                           | COL9A3, COL8A1, FMOD, MGP, MATN3, COL5A1, EFEMP2, SNTB2, LAMB2, COL6A3, LTBP2, ADAMTS5, SGCB, ERBB2IP, FBN1, FBLN2, POSTN, CTGF, COL18A1, FBLN1, COL4A2, FBLN5, NID2, MMP10, COL15A1, LAMB1                                                                                                                              |        |
| Extracellular matrix      | MUC5AC, APLP1, OPTC, TFPI2, COL7A1, COL3A1, COL9A1, COL1A2, COL5A2, ODAM, EFEMP1, ECM1, LAMC1, COL16A1, TNXB, DSPP, COL10A1, COL9A3, COL8A1, FMOD, MGP, MATN3, COL5A1, EFEMP2, SNTB2, LAMB2, COL6A3, LTBP2, ADAMTS5, SGCB, ERBB2IP, FBN1, FBLN2, POSTN, CTGF, COL18A1, FBLN1, COL4A2, FBLN5, NID2, MMP10, COL15A1, LAMB1 | <0.001 |
| Extracellular matrix part | MUC5AC, APLP1, COL7A1, COL3A1, COL9A1, COL1A2, COL5A2, ODAM, LAMC1, COL16A1, TNXB, COL10A1, COL9A3, COL8A1, COL5A1, EFEMP2, SNTB2, LAMB2, COL6A3, SGCB, ERBB2IP, FBN1, COL18A1, COL4A2, NID2, COL15A1, LAMB1                                                                                                             | <0.001 |
| Collagen                  | COL7A1, COL3A1, COL9A1, COL1A2, COL5A2, COL16A1, TNXB, COL10A1, COL9A3, COL8A1, COL5A1, COL6A3, COL18A1, COL4A2, COL15A1                                                                                                                                                                                                 | <0.001 |
| Basement membrane         | LAMC1, EFEMP2, SNTB2, LAMB2, SGCB, ERBB2IP, FBN1, COL4A2, NID2, LAMB1                                                                                                                                                                                                                                                    | <0.001 |
| Actin filament            | TSC1, AMOT, MYO6, ACTA1, PALLD, ACTC1                                                                                                                                                                                                                                                                                    | <0.001 |
| Cell matrix junction      | VCL, SORBS1, ERBB2IP, NEXN                                                                                                                                                                                                                                                                                               | 0.016  |
| Actin cytoskeleton        | MYL6, MYL9, MTSS1, MYH9, AMPH, CORO1A, TSC1, DCTN2, EPB49, KALRN, ARPC4, IPP, AMOT, MYO6, ACTR1A, ACTR2, TPM3, ACTA1, SPTBN1, CASK, ABRA, MYH10, VASP, MYOM1, ACTR3, KLHL2, VILL, CLIC4, FLNA, CORO1C, SORBS1, GSN, FLNB, PALLD, SMTN, ARPC5, CDC42EP3, TPM1, PDLIM5, ACTC1                                              | 0.025  |
| Basal lamina              | LAMC1, SNTB2, LAMB2, SGCB, LAMB1                                                                                                                                                                                                                                                                                         | 0.044  |
| Extracellular region part | COL9A1, COL1A2, COL5A2, PGCP, LGALS3BP, WNT5A, TCN2, IL5RA, IL15, VTN, CRLF1, FLT1,                                                                                                                                                                                                                                      | 0.061  |

---



---

|                                     |                                                                                                                                                                                                                                                                                                                                                                                                                                                                                                                                                                                    |       |
|-------------------------------------|------------------------------------------------------------------------------------------------------------------------------------------------------------------------------------------------------------------------------------------------------------------------------------------------------------------------------------------------------------------------------------------------------------------------------------------------------------------------------------------------------------------------------------------------------------------------------------|-------|
|                                     | ODAM, EFEMP1, ECM1, LAMC1, NUCB1, GPX3, FSTL3, DKK3, COL16A1, NOG, TNXB, DSPP, MMP2, FGF9, COL10A1, COL9A3, COL8A1, CDH13, FMOD, GPC1, PSAP, MGP, MATN3, COL5A1, EFEMP2, SNTB2, LAMB2, COL6A3, LTBP2, ADAMTS5, SGCB, ERBB2IP, INSL4, FBN1, FBLN2, REN, POSTN, CTGF, COL18A1, FBLN1, SST, LOXL2, NUCB2, PTN, COL4A2, IGFBP1, FBLN5, NID2, MMP3, MMP10, TGFBI, HTRA1, PCSK5, COL15A1, LAMB1                                                                                                                                                                                          |       |
| Lamellipodium                       | WASF2, DBNL, ABI1, TESC, TSC1, ITGB1BP1, APBB2, FGD3, AMOT, PDPN, ALS2, FAP, FGD6                                                                                                                                                                                                                                                                                                                                                                                                                                                                                                  | 0.100 |
| Extracellular region                | COL9A1, COL1A2, COL5A2, FRZB, PGCP, LPL, LGALS3BP, WNT5A, TCN2, IL5RA, IL15, VTN, CRLF1, EGFL7, FLT1, APP, ODAM, EFEMP1, ECM1, LAMC1, NUCB1, GPX3, FSTL3, DKK3, COL16A1, NOG, TNXB, DSPP, MMP2, FGF9, COL10A1, COL9A3, COL8A1, SERPINF1, CDH13, GSN, AGGF1, FMOD, GPC1, PSAP, MGP, MATN3, COL5A1, EFEMP2, CLEC11A, SNTB2, LAMB2, COL6A3, LTBP2, ADAMTS5, GLA, SGCB, ERBB2IP, INSL4, INHBB, FBN1, FBLN2, REN, POSTN, IFI30, CTGF, COL18A1, FBLN1, SST, LOXL2, NUCB2, PLTP, PTN, COL4A2, IGFBP1, FBLN5, NID2, MMP3, MMP10, RNASET2, TGFBI, HTRA1, PCSK5, COL15A1, PPT1, LAMB1, PAPPA | 0.099 |
| DNA-directed RNA polymerase complex | SFRS2IP, PPARGC1A, POLR3G, POLR2D, HCLS1, POLR2A, C19ORF2                                                                                                                                                                                                                                                                                                                                                                                                                                                                                                                          | 0.092 |
| Leading edge                        | DBNL, MYH9, ABI1, TESC, TSC1, ITGB1BP1, APBB2, FGD3, AMOT, TLN1, MYO6, CDC42BPG, CDK6, PDPN, ALS2, FAP, FDG6, CDC42BPA, MYO5A                                                                                                                                                                                                                                                                                                                                                                                                                                                      | 0.094 |
| Basolateral plasma membrane         | PTPRC, TJP1, STX2, SLC4A11, VCL, SORBS1, ERBB2IP, NEXN                                                                                                                                                                                                                                                                                                                                                                                                                                                                                                                             | 0.090 |
| ER golgi intermediate compartment   | NUCB1, P4HB, TMED10, ANPEP, PDIA6, ERGIC3, NUCB2, FN1                                                                                                                                                                                                                                                                                                                                                                                                                                                                                                                              | 0.090 |

---

|                    |                                                                                               |                                                                                                                                                                                                                                                                                                                                                 |       |
|--------------------|-----------------------------------------------------------------------------------------------|-------------------------------------------------------------------------------------------------------------------------------------------------------------------------------------------------------------------------------------------------------------------------------------------------------------------------------------------------|-------|
|                    | RNA polymerase complex                                                                        | SFRS2IP, PPARGC1A, POLR3G, POLR2D, HCLS1, POLR2A, C19ORF2                                                                                                                                                                                                                                                                                       | 0.103 |
|                    | Nuclear DNA-directed RNA polymerase complex                                                   | SFRS2IP, PPARGC1A, POLR3G, POLR2D, HCLS1, POLR2A, C19ORF2                                                                                                                                                                                                                                                                                       | 0.098 |
|                    | Lytic vacuole                                                                                 | TOM1L1, NAGLU, RAMP2, DNASE2, SLC17A5, ANKRD27, CTSF, NPC2, TPP1, GLA, IFI30, GALC, PPT1                                                                                                                                                                                                                                                        | 0.099 |
|                    | Microtubule associated complex                                                                | KIF5B, MAP1A, KIF3C, KIF15, ATG4D, DCTN2, ACTR1A, KIF5C, EML2, MAP4, KIFAP3, KIF1B, KIF23, DYNC1LI2, MAP1B, MAP2                                                                                                                                                                                                                                | 0.095 |
|                    | Lysosome                                                                                      | TOM1L1, NAGLU, RAMP2, DNASE2, SLC17A5, ANKRD27, CTSF, NPC2, TPP1, GLA, IFI30, GALC, PPT1                                                                                                                                                                                                                                                        | 0.119 |
|                    | Myofibril                                                                                     | DES, TPM3, ACTA1, ABRA, MYOM1, TTN, VCL, TPM1                                                                                                                                                                                                                                                                                                   | 0.234 |
|                    | Vacuole                                                                                       | TOM1L1, NAGLU, RAMP2, DNASE2, SLC17A5, ANKRD27, CTSF, NPC2, TPP1, GLA, IFI30, GALC, PPT1                                                                                                                                                                                                                                                        | 0.227 |
| Molecular function | Oxidoreductase activity acting on the aldehyde or oxo group of donors                         | ADH5, ALDH3A1, ALDH2, ALDH9A1, PDHA2, GAPDHS, PDHB, ALDH6A1, ALDH1A1, AOX1, ALDH1A3                                                                                                                                                                                                                                                             | 0.025 |
|                    | Structural constituent of muscle                                                              | TCAP, MYOM1, TTN, SMTN, TPM1, ACTC1, ASPH                                                                                                                                                                                                                                                                                                       | 0.026 |
|                    | Extracellular matrix structural constituent                                                   | KAL1, OPTC, TFPI2, LAMC1, DSPP, MGP, MATN3, EFEMP2, FBN1, FBLN2, COL4A2, LAMB1                                                                                                                                                                                                                                                                  | 0.021 |
|                    | Oxidoreductase activity acting on the aldehyde or oxo group of donors NAD or NADP as acceptor | ALDH4A1, ADH5, ALDH3A1, ALDH2, ALDH9A1, GAPDHS, ALDH6A1, ALDH1A1, ALDH1A3                                                                                                                                                                                                                                                                       | 0.034 |
|                    | Peptidase activity                                                                            | ACE2, SENP1, ATG4D, MMP24, CTSO, CASP9, USP12, KLKB1, SENP2, CAPN11, USP5, MAP1D, F11, IDE, AEBP1, METAP2, NPEPPS, CTSS, USP9X, USP7, RCE1, CTSH, CTSK, PGCP, TPP2, BLMH, MME, LNPEP, CFI, ADAMTS2, CORIN, F10, MMP2, CTSD, MMP12, CPE, FAP, TRHDE, DPP4, ANPEP, CFD, TPP1, C1S, LGMN, CTSB, REN, PDIA3, USP53, MMP3, MASP1, GGH, HTRA1, CASP6, | 0.120 |

---

|                                                            |                                                                                                                                                                                                                                           |       |
|------------------------------------------------------------|-------------------------------------------------------------------------------------------------------------------------------------------------------------------------------------------------------------------------------------------|-------|
| Integrin binding                                           | PAPPA<br>COL4A3, ADAM9, ADAM11, THY1, SYK, ICAM4,<br>ADAM23, COL16A1, TNXB, ADAMST5, ERBB2IP,<br>FBLN5, TGFB1                                                                                                                             | 0.125 |
| Exopeptidase activity                                      | CPD, ACE2, MAP1D, AEBP1, METAP2, NPEPPS,<br>PGCP, BLMH, LNPEP, CPE, TRHDE, DPP4, ANPEP,<br>TPP1, GGH                                                                                                                                      | 0.157 |
| Protein N-terminus binding                                 | GTF2H3, APTX, TSC1, SMARCE1, ERCC4, NCOA1,<br>GTF2H2, NFE2, ZWINT, CSNK2A2, SMARCA4,<br>GLRX, NCOA3, NBN, PGR                                                                                                                             | 0.181 |
| Sulfotransferase activity                                  | CHST13, TPST1, HS6ST1, UST, CHST7                                                                                                                                                                                                         | 0.212 |
| Endopeptidase activity                                     | SENPI1, ATG4D, MMP24, CTSO, CASP9, KLKB1,<br>CAPN11, USP5, F11, IDE, CTSS, USP9X, USP7,<br>RCE1, CTSH, STCK, TPP2, BLMH, CFI, ADAMTS2,<br>CORIN, F10, MMP2, CTSD, MMP12, FAP, CFD,<br>C1S, LGMN, CTSB, REN, PDIA3, MMP3, MASP1,<br>HTRA1, | 0.205 |
| Intramolecular oxidoreductase activity                     | ERP29, P4HB, PDIA6, PDIA3, PDIA5, GNPDA1                                                                                                                                                                                                  | 0.190 |
| Metallopeptidase activity                                  | MAP1D, IDE, METAP2, RCE1, PGCP, MME,<br>LNPEP, ADAMTS2, MMP2, MMP12, FAP, ANPEP,<br>MMP3, PAPPA                                                                                                                                           | 0.197 |
| Hydrolase activity hydrolyzing <i>o</i> glycosyl compounds | NAGA, MANBA, NAGLU, PARG, MAN2B1,<br>FUCA1, GLA, GLB1, GUSB, HEXB, MAN1A2                                                                                                                                                                 | 0.218 |
| Unfolded protein binding                                   | TAPBP, DNAJA3, TOR1B, PPIC, NAP1L4, LRPAP1,<br>AIPL1, HSPA2, RP2, MKKS, PPIB, SCG5, CLGN                                                                                                                                                  | 0.209 |

---

**Supplement Table S8B.** Summary of GSEA result in *siKLF9* vs. NT with FDR  $\leq 0.25$ .

|                                      | GO                 | Functional Processes                                 | Gene                                                                                                                                                                                                                                                                                                                            | FDR   |
|--------------------------------------|--------------------|------------------------------------------------------|---------------------------------------------------------------------------------------------------------------------------------------------------------------------------------------------------------------------------------------------------------------------------------------------------------------------------------|-------|
| <b>Enriched in<br/><i>siKLF9</i></b> | Biological process | Microtubule cytoskeleton organization and biogenesis | TTK, PRC1, MAP1S, STMN1, PAFAH1B1, MAPT, NUSAP1, KIF23, SMC3, MID1IP1, RCC1, RAN, KIF2C, TUBG1                                                                                                                                                                                                                                  | 0.008 |
|                                      |                    | Meiotic recombination                                | RAD51L1, RAD51L3, LIG3, SYCP1, SPO11, RAD50, MSH5                                                                                                                                                                                                                                                                               | 0.111 |
|                                      |                    | Mitosis                                              | TTK, CCNA2, ANLN, UBE2C, MAD2L1, BUB1B, TGFB1, NEK2, BUB1, CETN1, SSSCA1, ZW10, ESPL1, NUSAP1, PLK1, KIF25, GML, CENPE, SMC3, ANAPC11, CDC16, BIRC5, BRSK1, SMC4, RCC1, RAN, NUMA1, KIF2C, NOLC1, CD28, CDC23, TPX2, DCTN2, CDC27                                                                                               | 0.250 |
|                                      |                    | M phase of mitotic cell cycle                        | TTK, CCNA2, ANLN, UBE2C, MAD2L1, BUB1B, TGFB1, NEK2, BUB1, CETN1, SSSCA1, ZW10, ESPL1, NUSAP1, PLK1, KIF25, GML, CENPE, SMC3, ANAPC11, CDC16, BIRC5, BRSK1, SMC4, RCC1, RAN, NUMA1, KIF2C, NOLC1, CD28, CDC23, TPX2, DCTN2, CDC27                                                                                               | 0.238 |
|                                      |                    | M phase                                              | TTK, CCNA2, ANLN, UBE2C, MAD2L1, BUB1B, TGFB1, NEK2, RAD51L1, RAD51L3, BUB1, CETN1, SSSCA1, ZW10, TAF1L, LIG3, ESPL1, NUSAP1, SYCP1, SPO11, RAD50, PLK1, KIF25, GML, CENPE, SMC3, MSH5, ANAPC11, CDC16, BIRC5, SC65, BRSK1, SMC4, DUSP13, RCC1, RAN, NUMA1, KIF2C, NOLC1, CD28, CDC23, TPX2, DCTN2, CDC27                       | 0.219 |
|                                      |                    | Positive regulation of transcription                 | EGR1, CREBBP, NCOA6, GLIS2, MKL2, MAML2, FOXE1, TBX5, TGFB1, NUFIP1, CAMKK2, ESRRG, SMARCC1, PRPF6, ILF3, SPI1, THRAP3, NFATC2, BCL10, SMARCD1, RXRA, MED12, TFAP2B, GATA4, PCBD2, SCAP, TCF3, RSF1, NPAS2, NUP62, ARID1A, SMARCD3, ATF7IP, BCL3, SMAD3, YWHAH, UTF1, CDK7, ELF1, IRF4, HMGA1, GLI2, CRTCL1, CTCF, GTF2H1, ATF4 | 0.223 |

|                      |                          |                                                                                                                                                                                                                                                                                                                                                                                                                                                                      |       |
|----------------------|--------------------------|----------------------------------------------------------------------------------------------------------------------------------------------------------------------------------------------------------------------------------------------------------------------------------------------------------------------------------------------------------------------------------------------------------------------------------------------------------------------|-------|
|                      | Cell cycle process       | TTK, CDKN3, PRC1, CCNA2, ANLN, UBE2C, MAD2L1, BUB1B, TGFB1, NEK2, STMN1, MDM4, RAD51L1, RAD51L3, BUB1, CETN1, PAFAH1B1, SSSCA1, ZW10, TAF1L, LIG3, MAP3K11, ESPL1, , NUSAP1, SYCP1, APBB2, KATNA1, SAC3D1, SPO11, RAD50, MYH10, POLD1, KIF23, PLK1, KIF25, GML, CENPE, CENPF, SMC3, MSH5, ANAPC11, CDC16, RACGAP1, CDC7, SKP2, BIRC5, SC65, BRSK1, SMC4, DUSP13, RCC1, RAN, NUMA1, BCAT1, KIF2C, TUBG1, NOLC1, CD28, CDC23, TPX2, NPM1                               | 0.248 |
| Cellular compartment | Spindle                  | TTK, PRC1, CDC20, KIF4A, BUB1, CETN1, PAFAH1B1, ZW10, KATNA1, SAC3D1, KIF23, CENPF, SMC3, CDC16, BIRC5, NUMA1, TUBG1, TPX2, CDC27                                                                                                                                                                                                                                                                                                                                    | 0.250 |
|                      | Spindle pole             | BUB1, CETN1, ZW10, KATNA1, CENPF, SMC3, NUMA1, TUBG1, TPX2                                                                                                                                                                                                                                                                                                                                                                                                           | 0.181 |
|                      | Spindle microtubule      | PRC1, KIF4A, PAFAH1B1, ZW10, CDC16, BIRC5, NUMA1, TUBG1, CDC27                                                                                                                                                                                                                                                                                                                                                                                                       | 0.233 |
|                      | Microtubule cytoskeleton | TOP2A, TTK, MAP1B, PRC1, CDC20, PXN, NIN, CROCC, PKHD1, EML1, NEK2, MAP1S, KIF4A, CEP57, BUB1, CETN1, MAP2, PAFAH1B1, ZW10, MAPT, MAP3K11, ESPL1, CEP63, CDK5RAP2, KATNA1, SAC3D1, KIF23, KLC2, CENPF, SMC3, CDC16, THAP6, MAP4, BIRC5                                                                                                                                                                                                                               | 0.185 |
|                      | Cytoskeletal part        | TOP2A, TTK, MAP1B, LMNB1, TNNC1, PRC1, ANLN, CDC20, PXN, TCHP, NIN, CROCC, EML1, NEK2, MAP1S, MYO18B, KIF4A, CEP57, BUB1, CETN1, MAP2, PAFAH1B1, ZW10, MAPT, MAP3K11, ESPL1, CEP63, CDK5RAP2, SHROOM1, KATNA1, SAC3D1, MYH10, TPM4, TNNT2, LLGL1, KIF23, PLK1, DRD2, KIF25, KLC2, CENPF, SMC3, CDC16, MAP4, BIRC5, ACTN2, MYO1C, CEP290, CAPG, NUMA1, MYH6, ARPC2, KIF2C, TUBG1, LASP1, KIF5A, LCK, VIM, TPX2, NPM1, IQGAP1, STAU1, DCTN2, CDC27, GYS2, TNNI3, KRT2, | 0.168 |

|                                    |                    |                                                           |                                                                                                                                                                                                                                                                                                                                                                                                                                                                                                                                                                                                                                                                                                                                                                |       |
|------------------------------------|--------------------|-----------------------------------------------------------|----------------------------------------------------------------------------------------------------------------------------------------------------------------------------------------------------------------------------------------------------------------------------------------------------------------------------------------------------------------------------------------------------------------------------------------------------------------------------------------------------------------------------------------------------------------------------------------------------------------------------------------------------------------------------------------------------------------------------------------------------------------|-------|
|                                    |                    |                                                           | MEFV, CACNA1C, SPTA1, BMF, SPTBN1, SPTBN2, CD2AP, MYO9B                                                                                                                                                                                                                                                                                                                                                                                                                                                                                                                                                                                                                                                                                                        |       |
|                                    |                    | Microtubule                                               | PRC1, MAP1S, KIF4A, CEP57, PAFAH1B1, ZW10, MAPT, MAP3K11, CDC16, BIRC5, NUMA1, TUBG1                                                                                                                                                                                                                                                                                                                                                                                                                                                                                                                                                                                                                                                                           | 0.163 |
|                                    |                    | Pore complex                                              | C7, NUP107, KPNB1, NUP214, TMEM48, SNUPN, TPR, NXT1, NUTF2, NUP62, NUP153, NUP88, RANGAP1                                                                                                                                                                                                                                                                                                                                                                                                                                                                                                                                                                                                                                                                      | 0.220 |
|                                    |                    | Cytoskeleton                                              | TOP2A, TTK, MAP1B, LMNB1, TNNC1, PRC1, CDC42EP3, WASF2, ANLN, IQGAP2, TUBB, UTRN, CDC20, PXN, TCHP, NIN, CROCC, PKHD1, EML1, FLNB, NEK2, MAP1S, TUBB2C, WASL, DAG1, ANXA1, HSPB1, MYO18B, KIF4A, EPB41LL4B, MCF2, CEP57, BUB1, CETN1, MAP2, PAFAH1B1, ZW10, MAPT, MAP3K11, ESPL1, DYNLL2, MYOM1, CEP63, CDK5RAP2, EDA, SHROOM1, KATNA1, SAC3D1, SORBS2, MYH10, TPM4, TNNT2, LLGL1, KIF23, PLK1, DRD2, KIF25, KLC2, CENPF, SMC3, CTTNBP2NL, CDC16, THAP6, MAP4, BIRC5, ACTN2, FSCN2, CLIC5, MYO1C, CEP290, CAPG, PTPN21, NUMA1, WASF1, MYH6, ARPC2, KIF2C, TUBG1, LASP1, TGM1, EPB42, KIF5A, SYNPO, DDX20, LCK, FSCN1, VIM, PPL, TPX2, NPM1, IQGAP1, STAU1, DNAH9, DCTN2, CDC27, GYS2, LOR, VASP, TNNI3, KRT2, MEFV, CACNA1C, SPTA1, BMF, SPTBN1, CPTBN2, CD2AP | 0.201 |
|                                    | Molecular function | DNA polymerase activity                                   | POLE2, REV3L, POLG, TEP1, POLI, POLD1, POLQ, DKC1                                                                                                                                                                                                                                                                                                                                                                                                                                                                                                                                                                                                                                                                                                              | 0.243 |
|                                    |                    | Nucleotidyltransferase activity                           | UGP2, THG1L, PRIM1, POLE2, REV3L, POLG, TEP1, POLI, POLD1, USP14, POLQ, DKC1, UAP1                                                                                                                                                                                                                                                                                                                                                                                                                                                                                                                                                                                                                                                                             | 0.243 |
| <b>Diminished in <i>siKLF9</i></b> | Biological process | Positive regulation of protein amino acid phosphorylation | CCND3, IL5, IL3, BMP4, IL29, CCND2, LYN, HCLS1                                                                                                                                                                                                                                                                                                                                                                                                                                                                                                                                                                                                                                                                                                                 | 0.043 |
|                                    |                    | Jak stat cascade                                          | SOCS2, STAT5B, IL29, STAT2, LYN, STAT1, SOCS3, HCLS1                                                                                                                                                                                                                                                                                                                                                                                                                                                                                                                                                                                                                                                                                                           | 0.171 |

**Supplement Table S8C.** Summary of GSEA result in *siPGR* vs. NT with FDR  $\leq 0.25$ .

|                                       | GO                   | Functional Processes               | Gene                                                                                                                                                                                                                                                                                                                                                    | FDR   |
|---------------------------------------|----------------------|------------------------------------|---------------------------------------------------------------------------------------------------------------------------------------------------------------------------------------------------------------------------------------------------------------------------------------------------------------------------------------------------------|-------|
| <b>Diminished in<br/><i>siPGR</i></b> | Cellular compartment | Proteinaceous extracellular matrix | MATN3, COL5A2, COL4A5, EFEMP1, TFPI2, EFEMP2, COL8A1, SNTB2, COL10A1, SGCB, COL9A1, LAMC1, DSPP, COL15A1, POSTN, MATN1, PI3, FBLN2, COL6A3, FBN1, ECM1, MMP10, COL7A1, COL9A3, ERBB2IP, FBLN1, FBLN5, COL5A1, LTBP2, ADAMTS5, NID2, COL18A1, CTGF, COL4A2, LAMB1                                                                                        | 0.002 |
|                                       |                      | Extracellular matrix               | SOD1, MATN3, COL5A2, COL4A5, EFEMP1, TFPI2, EFEMP2, COL8A1, SNTB2, COL10A1, SGCB, COL9A1, LAMC1, DSPP, COL15A1, POSTN, MATN1, PI3, FBLN2, COL6A3, FBN1, ECM1, MMP10, COL7A1, COL9A3, ERBB2IP, FBLN1, FBLN5, COL5A1, LTBP2, ADAMTS5, NID2, COL18A1, CTGF, COL4A2, LAMB1                                                                                  | 0.006 |
|                                       |                      | Extracellular matrix part          | LAMB2, COL5A2, COL4A5, EFEMP2, COL8A1, SNTB2, COL10A1, SGCB, COL9A1, LAMC1, COL15A1, COL6A3, FBN1, COL7A1, COL9A3, ERBB2IP, COL5A1, NID2, COL18A1, COL4A2, LAMB1                                                                                                                                                                                        | 0.065 |
|                                       |                      | Collagen                           | COL4A3, COL5A3, COL3A1, COL1A2, COL5A2, COL4A5, COL8A1, COL10A1, COL9A1, COL15A1, COL6A3, COL7A1, COL9A3, COL5A1, COL18A1, COL4A2                                                                                                                                                                                                                       | 0.051 |
|                                       |                      | Basement membrane                  | LAMB2, COL4A5, EFEMP2, SNTB2, SGCB, LAMC1, FBN1, COL7A1, ERBB2IP, NID2, COL4A2, LAMB1                                                                                                                                                                                                                                                                   | 0.250 |
|                                       |                      | Extracellular region               | IDE, PGC, SOD1, SFN, ANGPTL1, MATN3, CFHR1, APOA5, COL5A2, COL4A5, MMP7, EFEMP1, GHRL, APP, TFPI2, MATN4, NUCB1, REG3A, PNLIPRP2, PNOC, IL3, FGF17, EFEMP2, PGCP, IGFALS, EDN1, ACE2, OSM, HPX, VTN, PTN, COL8A1, SNTB2, CDH13, COL10A1, CTF1, APOD, FSTL3, EGFL7, SGCB, COL9A1, CXCL9, GPHA2, MIA, IL27, FRZB, LAMC1, RNASE6, MMP9, DSPP, MMP2, FGF18, | 0.240 |

---

|                    |                                        |                                                                                                                                                                                                                                                                                                                                                                                                                            |       |
|--------------------|----------------------------------------|----------------------------------------------------------------------------------------------------------------------------------------------------------------------------------------------------------------------------------------------------------------------------------------------------------------------------------------------------------------------------------------------------------------------------|-------|
|                    |                                        | PSAP, LALBA, SST, INHBC, PLA2G4B, WNT5A, COL15A1, TCN2, POSTN, MATN1, PI3, PLA2G2D, LGALS3BP, FBLN2, CLEC11A, GLA, IL16, COL6A3, FBN1, IGFBP1, NUCB2, EFNA5, IL15, ECM1, PLTP, LPL, MMP10, AGGF1, COL7A1, WFDC2, COL9A3, SCG2, NOG, MMP3, ERBB2IP, LOXL2, REN, FBLN1, INSL4, FBLN5, COL5A1, SPINT2, LTBP2, HTRA1, ADAMTS5, CRLF1, NID2, TGFBI, COL18A1, IFI30, CTGF, PTX3, RNASET2, COL4A2, FLT1, LAMB1, INHBB, PPT1, PAPP |       |
| Molecular function | Structural constituent of muscle       | SMTN, MYL9, TPM1, ACTC1, ASPH                                                                                                                                                                                                                                                                                                                                                                                              | 0.111 |
|                    | Intramolecular oxidoreductase activity | P4HB, PDIA6, PDIA3, GNPDA1, PDIA5                                                                                                                                                                                                                                                                                                                                                                                          | 0.250 |
|                    | Oxidoreductase activity GO 0016705     | TYR, RGLN1, P4HA2, P4HB, PLOD2, SC5DL, NOS3, PLOD3, PTGS1, ASPH                                                                                                                                                                                                                                                                                                                                                            | 0.225 |
|                    | Isomerase activity                     | GNE, TOP2A, GLCE, PGM5, P4HB, PDIA6, PDIA3, GNPDA1, PDIA5,                                                                                                                                                                                                                                                                                                                                                                 | 0.233 |
|                    | Peptidase activity                     | CAPN9, IDE, KEL, USP9X, RCE1, ACR, USP12, METAP2, MAP1D, TRHDE, PGCP, ACE2, FURIN, USP7, GZMB, PROC, MMP12, CTSH, MME, LGMN, ANPEP, BLMH, USP9Y, MMP9, MMP2, TPP1, F11, CFD, ADAMTS2, ATG4D, CAPN11, CTSB, DPEP1, FAP, C1S, PDIA3, CTSD, MASP1, MMP3, REN, DPP4, GGH, HTRA1, F10, CASP6, USP53, PAPP                                                                                                                       | 0.210 |

---
